# Supplementary material
Source: ML conference proceedings conference paper supplement (https://openreview.net/forum?id=FPpZrRfz6Ss)
Supplement: supplementary_material [file attachment]

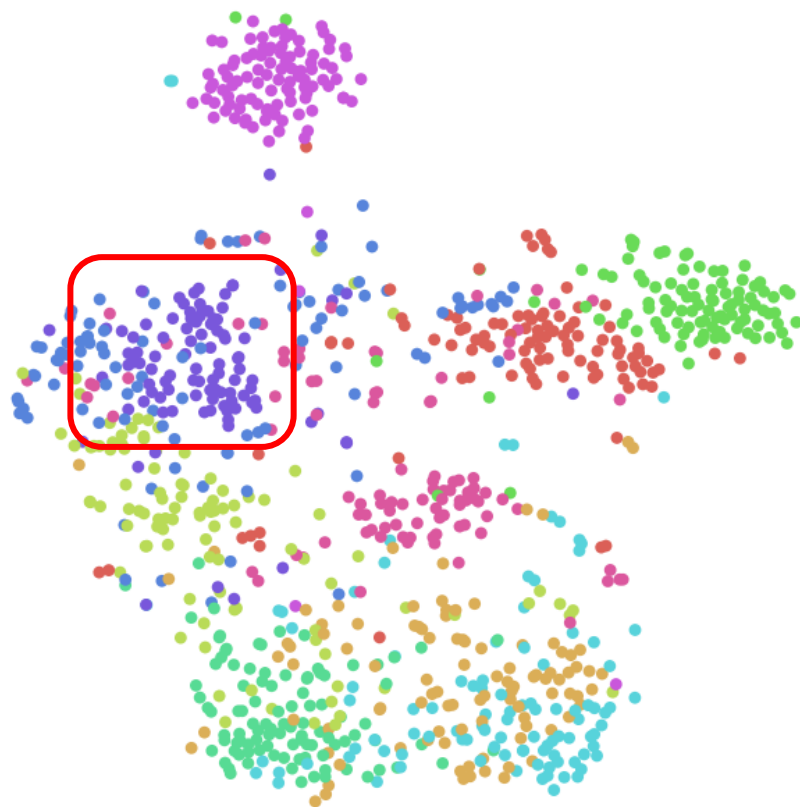

MAML

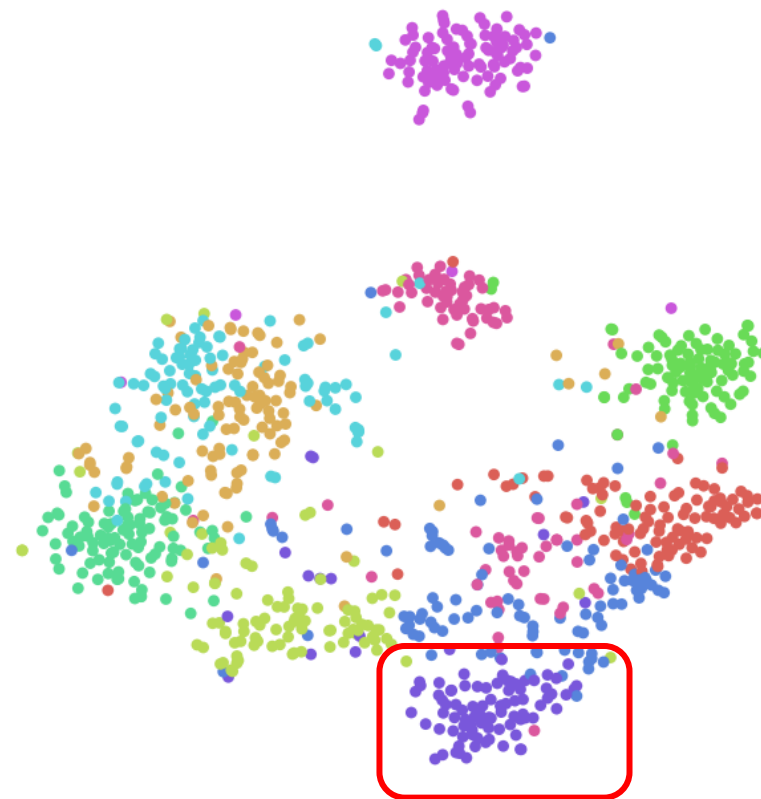

MCL

TieredImageNet: t-SNE embedding to visualize the features (10 class, each class contains 100 datapoints)

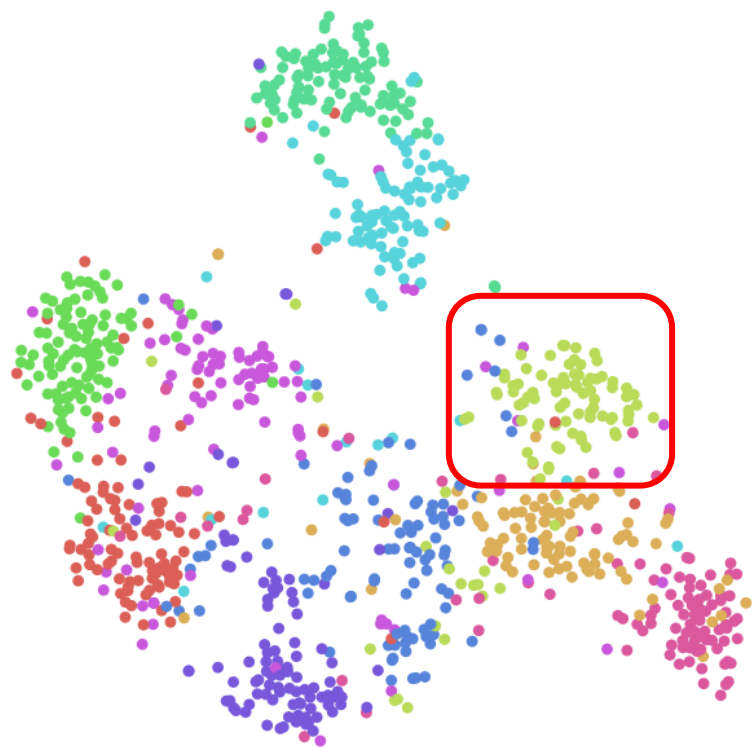

MAML

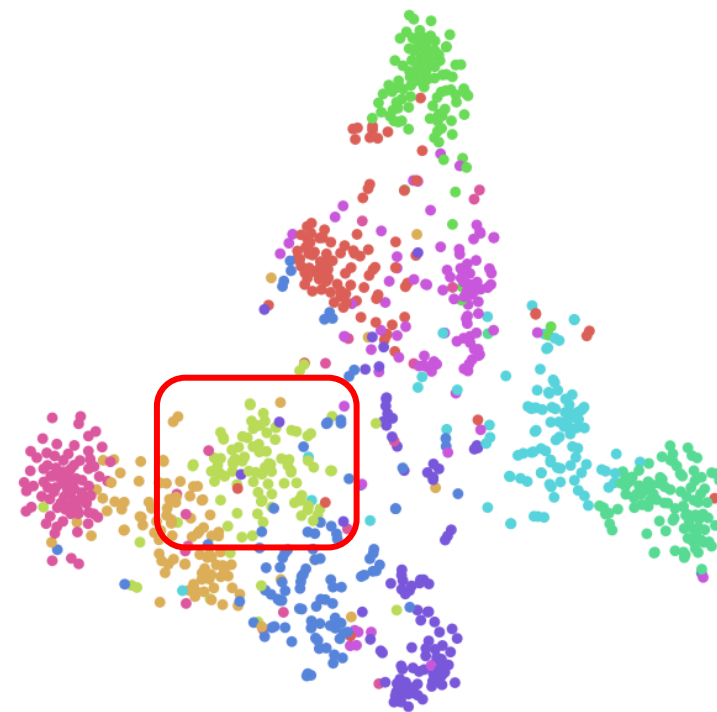

MCL

CIFAR-FS: t-SNE embedding to visualize the features (10 class, each class contains 100 datapoints)
